# Supplementary material
Source: Springer Nature journal article supplement (https://www.springermedizin.de/resource/supplementary/13075_2012_3603_MOESM13_ESM.pdf/9694898)

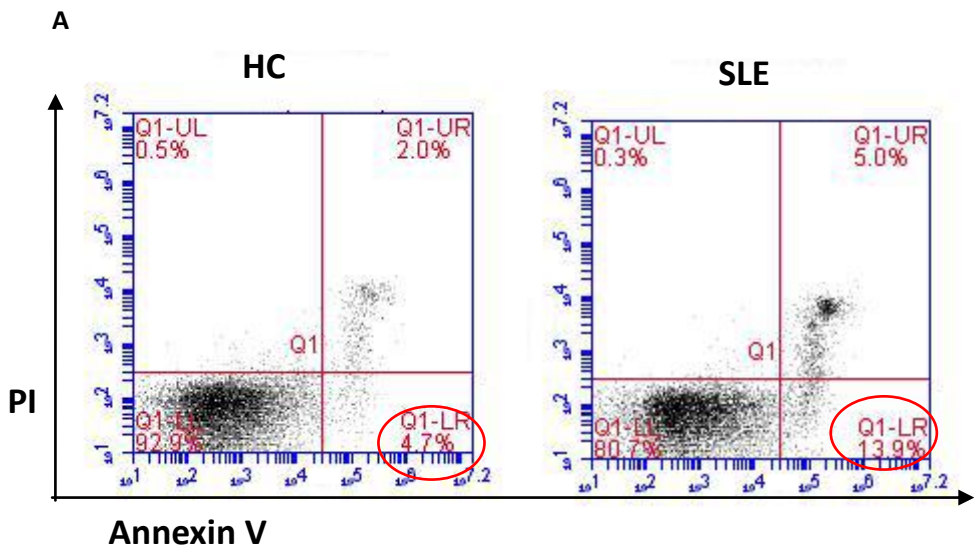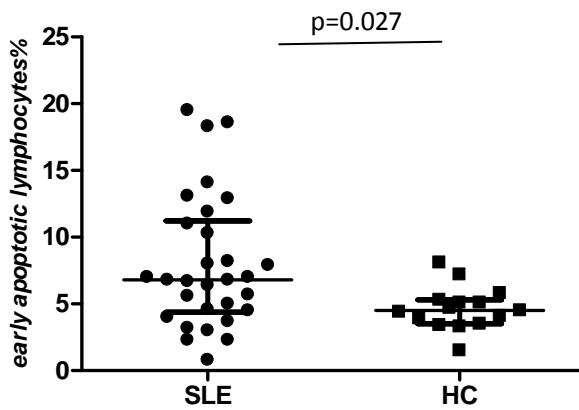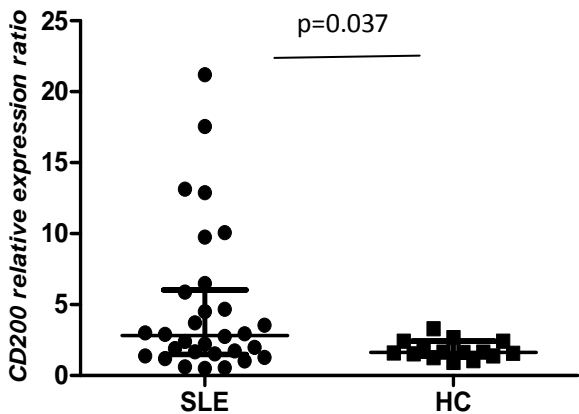

Supplement: MOESM13 [file 9694898]
